# Supplementary material for: When do Followers Perceive Their Leaders as Ethical? A Relational Models Perspective of Normatively Appropriate Conduct
Source: Springer Nature journal article supplement (doi:10.1007/s10551-018-4055-3), 2018-11-17
Supplement: MOESM1 [file 16277792]

**Appendix**

*Instructions, Response Scale and Wording of Relational Models Vignettes*

| **Instructions** | | |
| --- | --- | --- |
| Before starting this questionnaire, we ask you to think of a relationship that you have with your leader. First, we ask you to identify the relationship that you would want with your leader (ideal relation with your leader). And second, we ask you to identify the relationship that you actually have with your leader (current relation with your leader).  In the following, we ask you to read the descriptions of four different kind of relationships a leader and a follower could have and to identify whether you would like to have this relation with your leader (ideal) and to which degree this description fits your current relation with your leader (current) on a scale from 1 to 7; with 1 being not at all and 7 being fully applicable. | | |
| **Response Scale** | | |
| 1) This applies to my IDEAL leader. Not at all 1 2 3 4 5 6 7 Fully | | 2) This applies to my CURRENT leader. Not at all 1 2 3 4 5 6 7 Fully |
| **RM** | **Wording** | |
| CS | You and this person take a “one for all and all for one” approach toward one another. You each feel that “what is mine is yours” and that what happens to the other person is nearly as important as what happens to you. If the other person needed your help, you would cancel your plans and help them out, and they would do the same for you. Similarly, you would give the person the shirt off your back if they really needed it and they would do the same for you. You willingly share food with this person and, if necessary, you would happily share a soda using the same straw or share a meal using the same fork. | |
| AR | One of you tends to “call the shots” and take the initiative in this relationship and the other tends to follow along. One of you makes most of the decisions and the other one goes along with that person’s choices. The one in charge usually gets their way and takes responsibility for things. The other person is a follower in this relationship and backs the other person up, knowing that they can depend on the one in charge to lead and protect them when it is needed. | |
| EM | Your relationship is structured on a 50:50 basis. You feel like you and the other person are pretty equal in the things you do for each other. If they do something for you, you will try to do the same thing in return for them sometime. If the two of you were dividing something, you would probably split it down the middle into even shares. You often take turns doing things. As a way of keeping things balanced, you more or less keep track of favors and obligations between you. And you get irritated when you feel that the other person is taking more than they are giving. What you want is equal treatment and equal shares. | |
| MP | You interact with this person in a purely rational, businesslike way, because you “get your money’s worth”. Each of you feels entitled to a fair rate of return, in return for what you put into the interaction. How much you get out of your dealings with this person depends on precisely how much you put in. So you each keep track of the ratio of your “costs” (in terms of money, time, effort, or aggravation) in relation to your “benefits”. The interaction basically comes down to practical matters like these. When it comes down to it, you each choose to participate when it is profitable in terms of what you have to invest and the rewards that you get out of it. | |

*Notes.* RM = Relational Model;CS = Communal Sharing; AR = Authority Ranking; EM = Equal Matching; MP = Market Pricing. Vignettes’ wording is adopted from Haslam and Fiske (1992).
